# Supplementary material for: Synthesis and catalytic activity of well-defined Co(i) complexes based on NHC–phosphane pincer ligands
Source: Royal Society of Chemistry journal article supplement (doi:10.1039/d3dt00463e), 2023-01-01
Supplement: d3dt00463e1.pdf [file d3dt00463e1.pdf]

## Supporting Information for

# Synthesis and catalytic activity of well-defined Co(I) complexes based on NHC-phosphane pincer ligands

*Ana Luque-Gómez,<sup>a</sup> Pilar García-Orduña,<sup>a</sup> Fernando J. Lahoz,<sup>a</sup> Manuel Iglesias<sup>\*a</sup>*

*<sup>a</sup>Instituto de Síntesis Química y Catálisis Homogénea (ISQCH), Universidad de Zaragoza–CSIC, C/Pedro Cerbuna 12, 50009-Zaragoza, Spain. E-mail: miglesia@unizar.es*

### Table of Contents:

|                                                |    |
|------------------------------------------------|----|
| 1. NMR Spectra of <b>1</b> and <b>2</b>        | 2  |
| 2. FT-IR spectra of <b>1</b> and <b>2</b>      | 8  |
| 3. NMR Spectra of Table 1                      | 9  |
| 4. NMR Spectra of Table 2                      | 14 |
| 5. NMR spectra of stoichiometric experiments   | 18 |
| 6. NMR spectra of the dehydrocoupling products | 20 |

## 1. NMR Spectra of 1

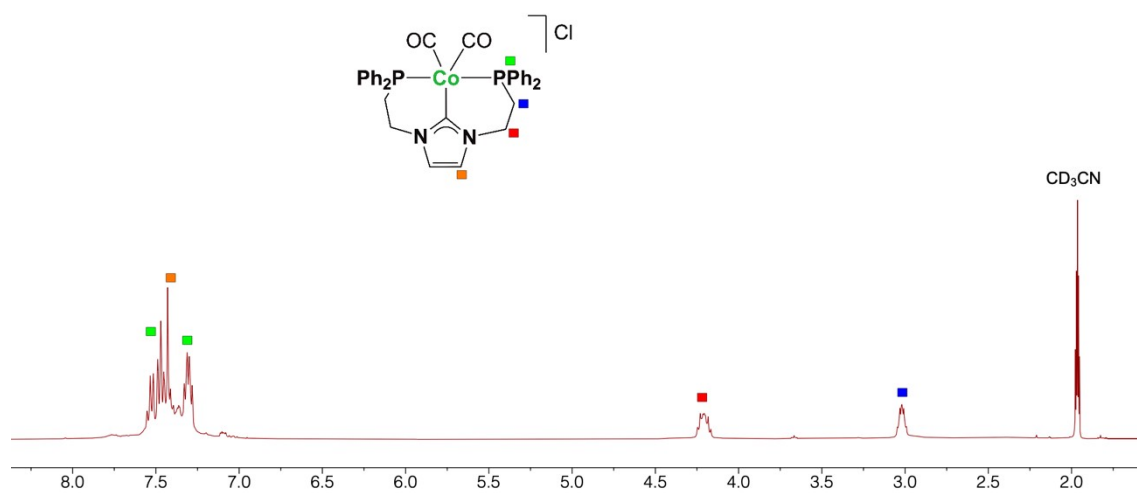

Figure S1.  $^1\text{H}$  NMR spectra of 1.

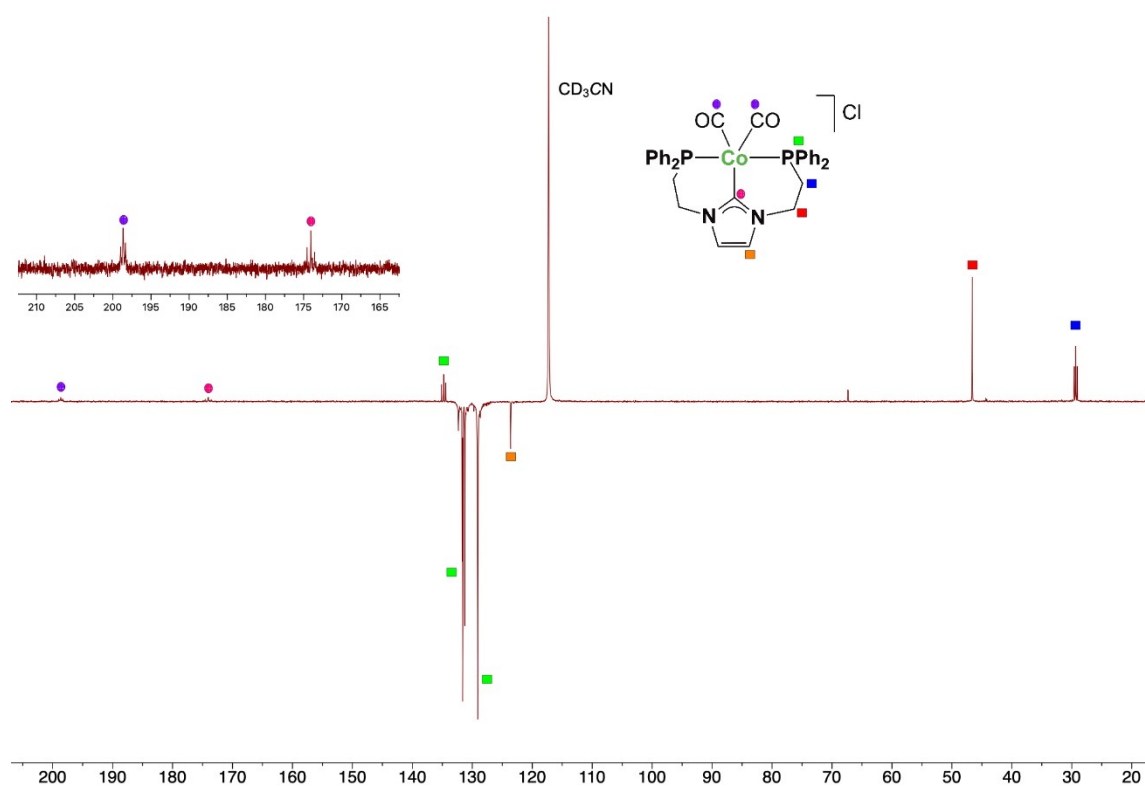

Figure S2. APT  $\{^1\text{H}\}$  NMR spectra of 1.

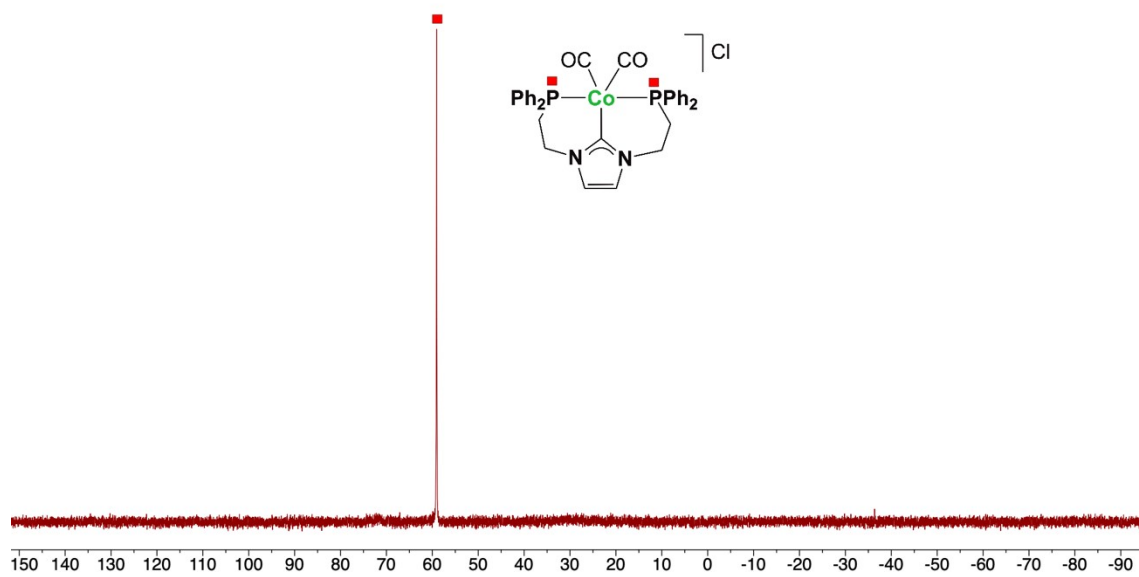

Figure S3.  $^{31}\text{P}\{^1\text{H}\}$  NMR spectra of 1.

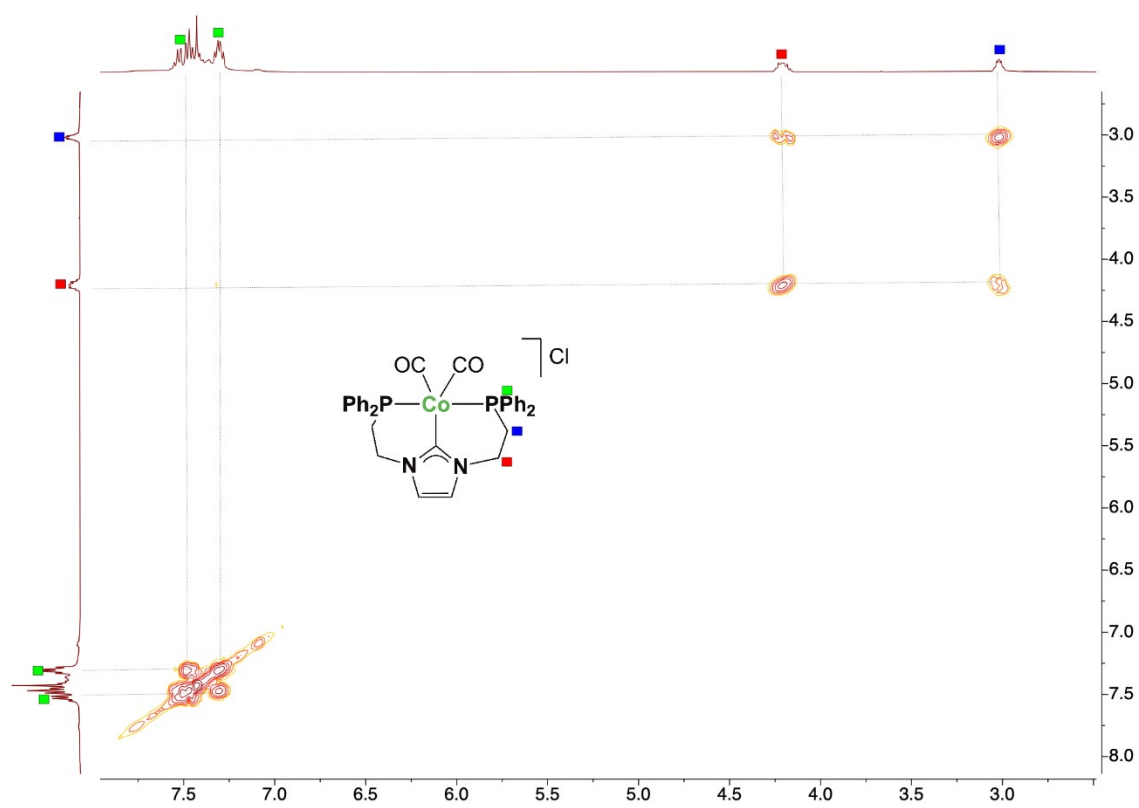

Figure S4.  $^1\text{H}\text{-}^1\text{H}$  COSY NMR spectra of 1.

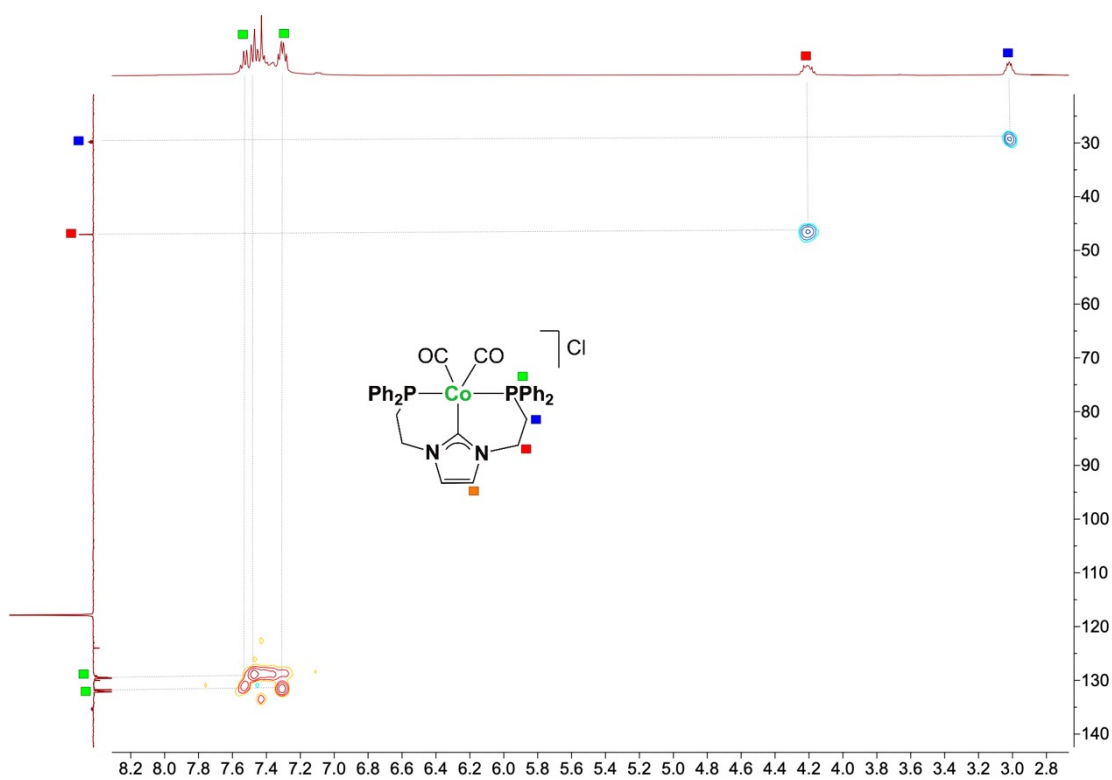

Figure S5.  $^1\text{H}$ - $^{13}\text{C}$  HSQC NMR spectra of **1**.

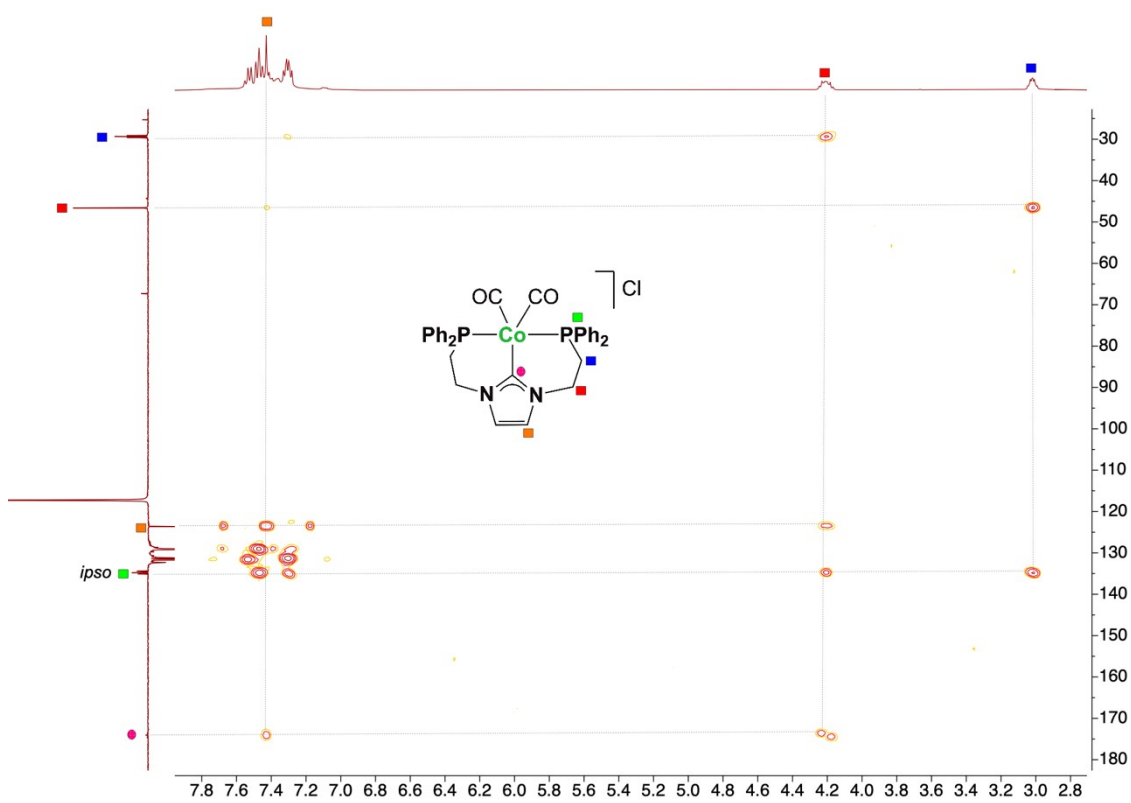

Figure S6.  $^1\text{H}$ - $^{13}\text{C}$  HMBC NMR spectra of **1**.

## 1. NMR Spectra of 2

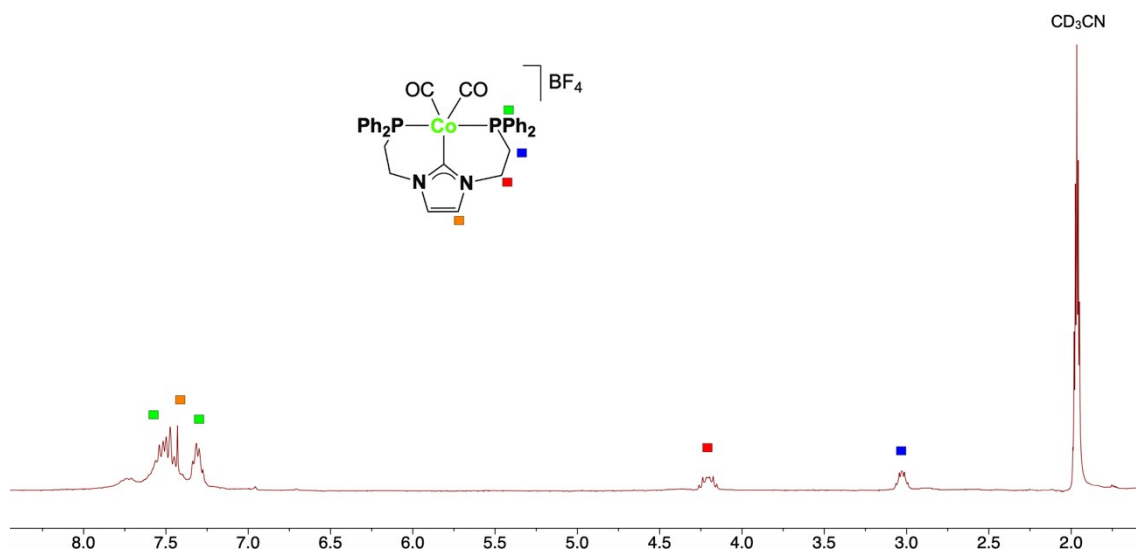

Figure S7.  $^1\text{H}$  NMR spectra of 2.

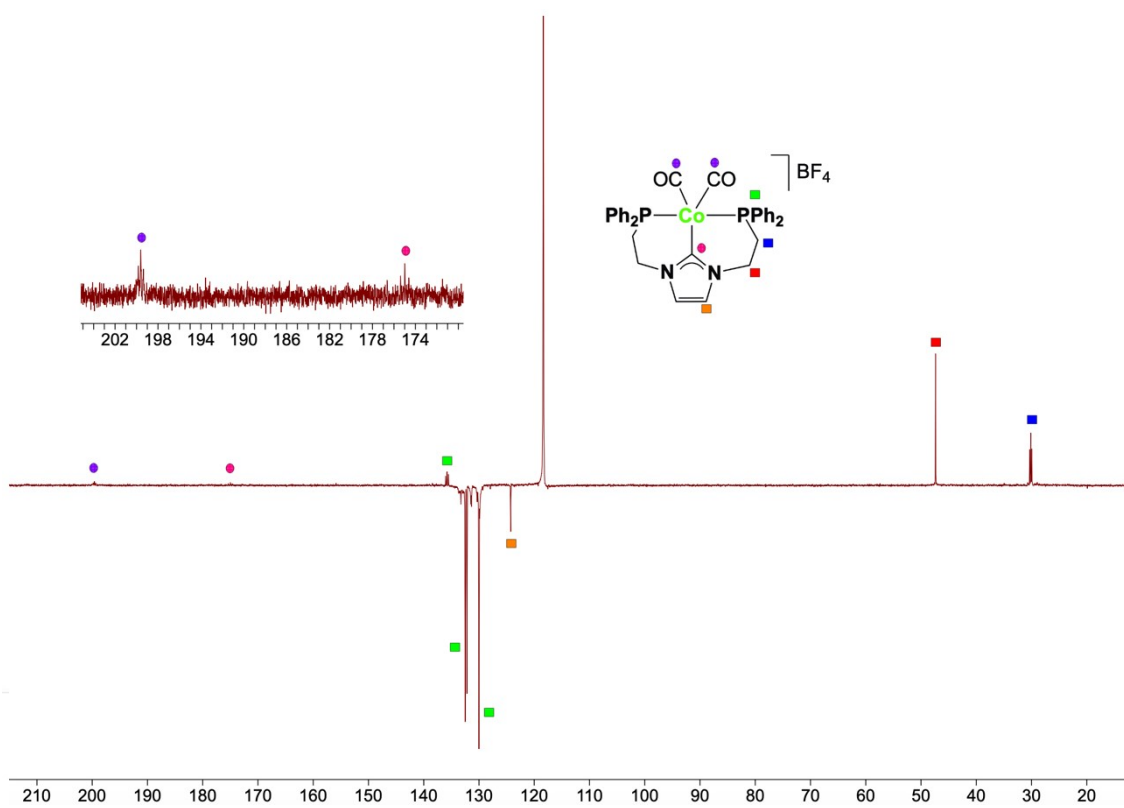

Figure S8. APT  $\{^1\text{H}\}$  NMR spectra of 2.

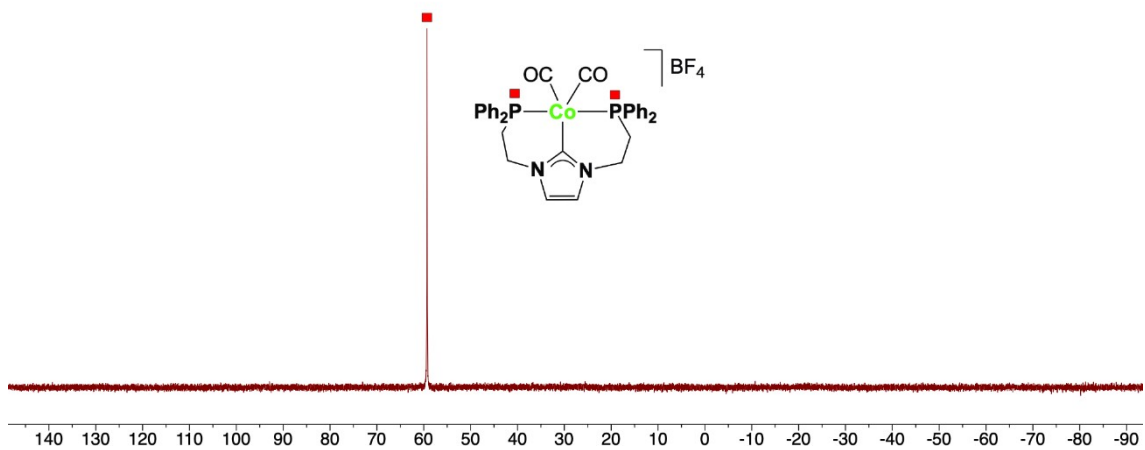

Figure S9.  $^{31}\text{P}\{^1\text{H}\}$  NMR spectra of **2**.

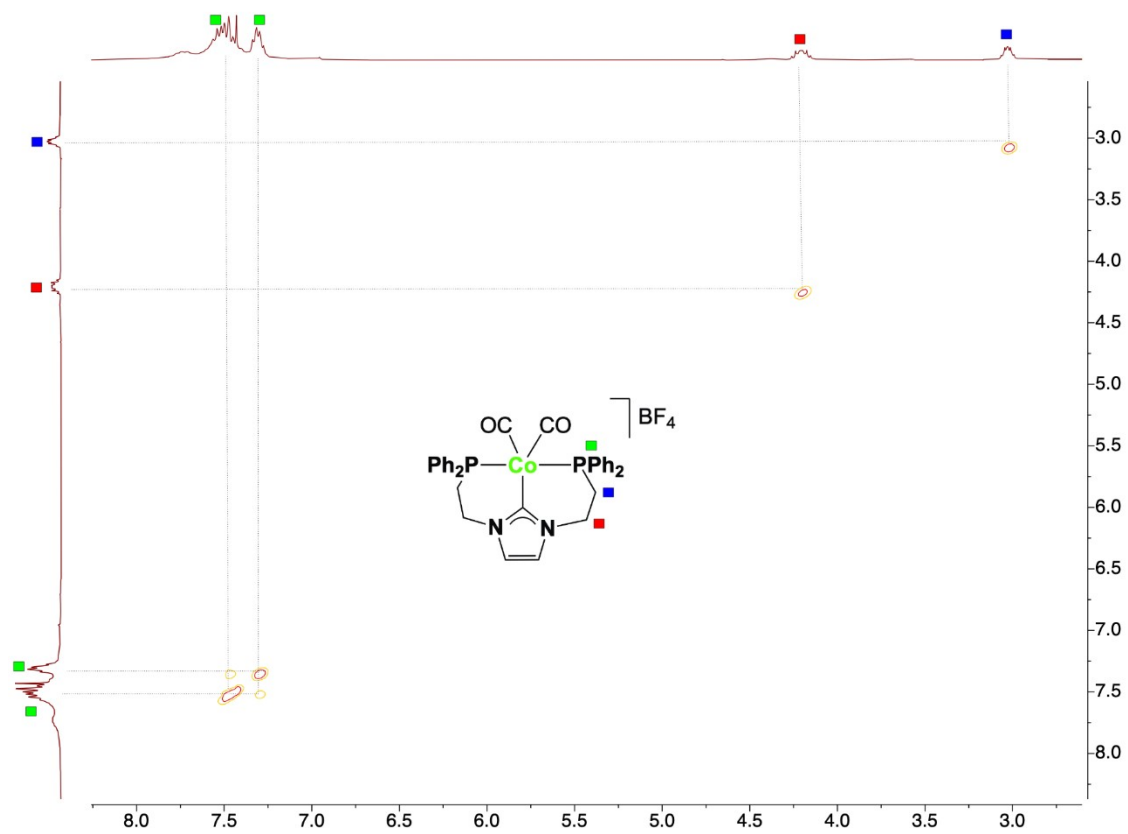

Figure S10.  $^1\text{H}$ - $^1\text{H}$  COSY NMR spectra of **2**.

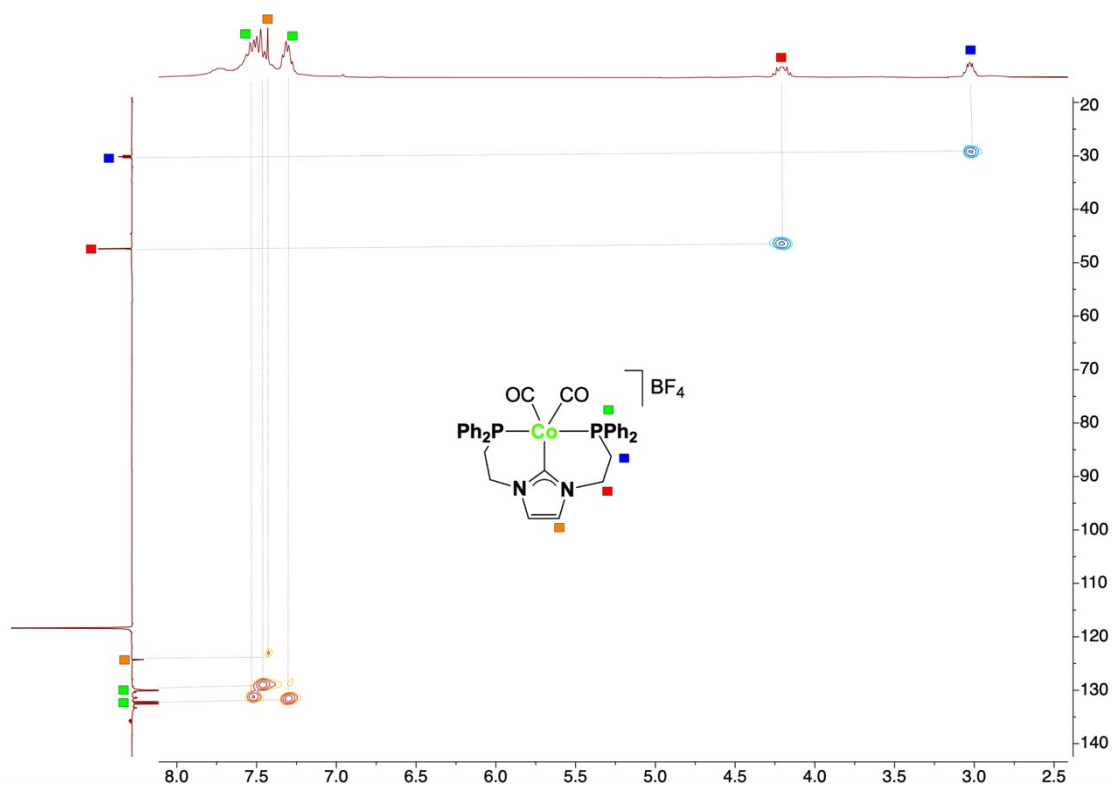

Figure S11.  $^1\text{H}$ - $^{13}\text{C}$  HSQC NMR spectra of **2**.

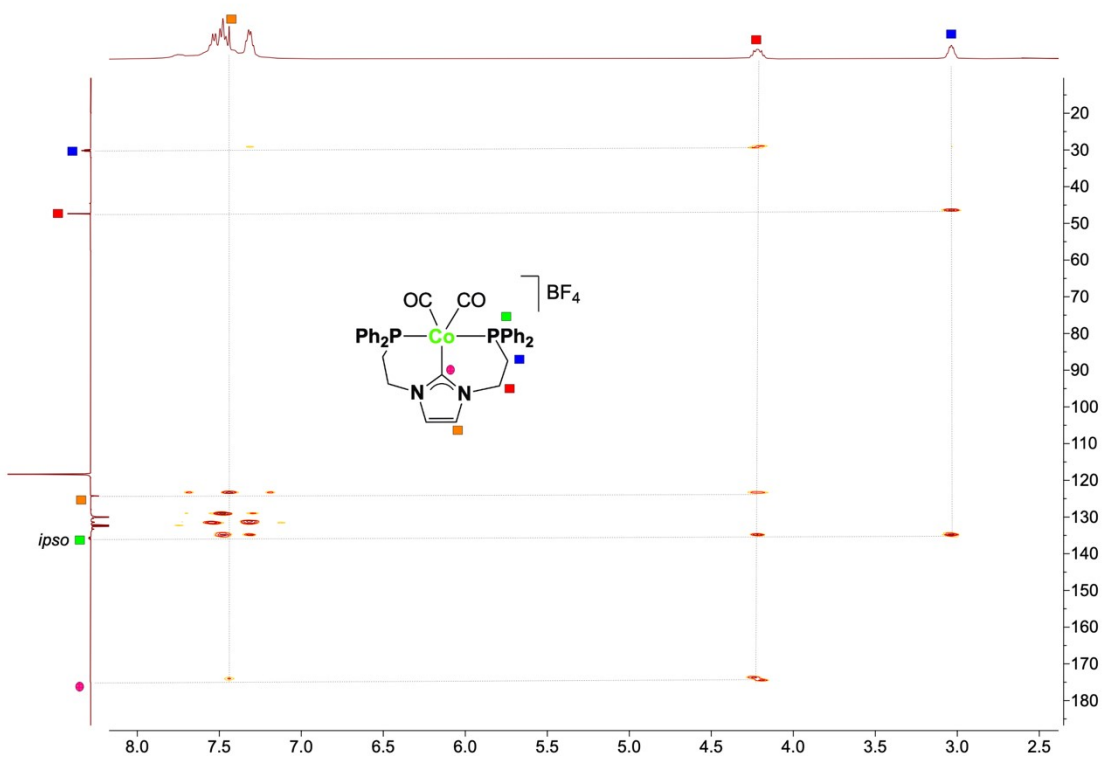

Figure S12.  $^1\text{H}$ - $^{13}\text{C}$  HMBC NMR spectra of **2**.

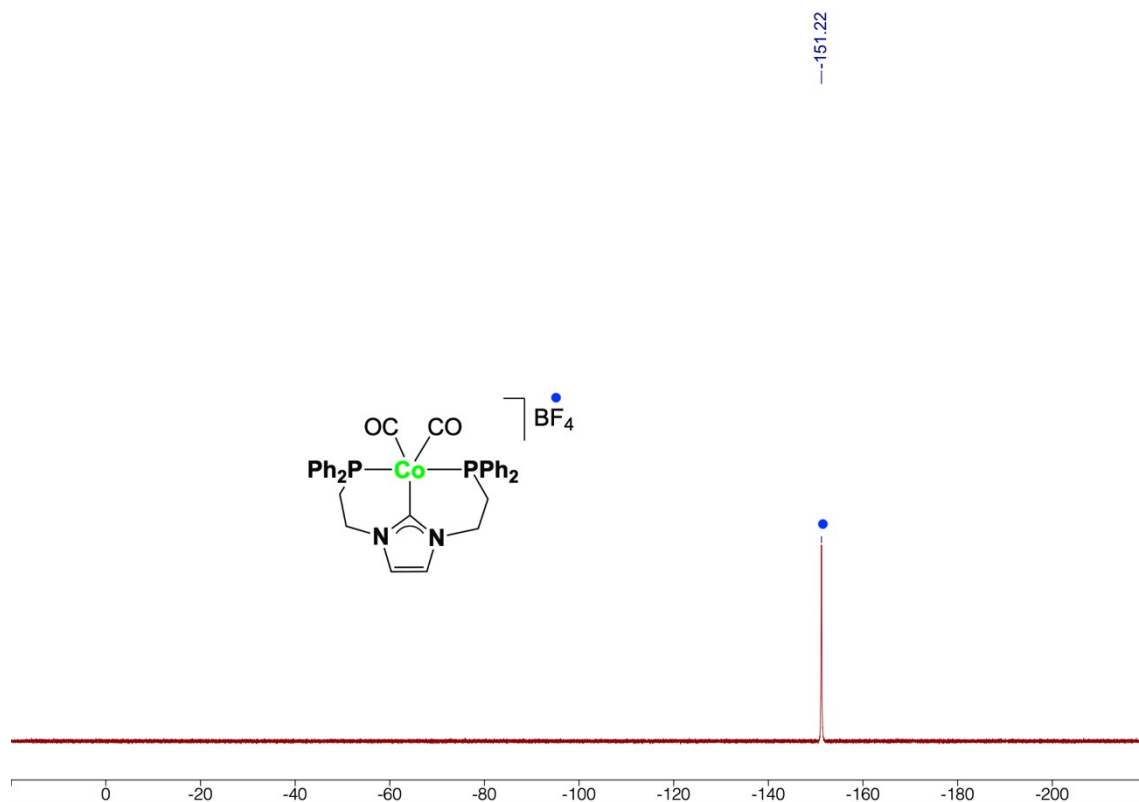

**Figure S13.**  $^{19}\text{F}\{^1\text{H}\}$  NMR spectra of **2**.

## 2. IR Spectra of 1 and 2

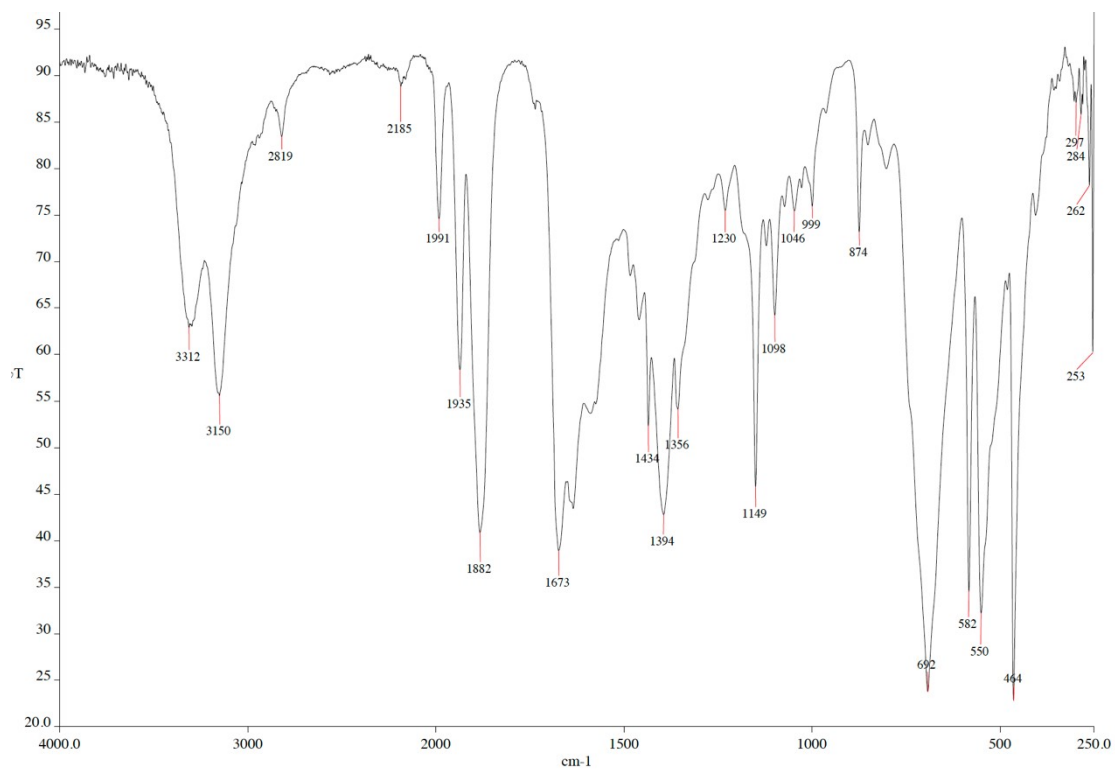

**Figure S14.** FT-IR spectra of **1**.



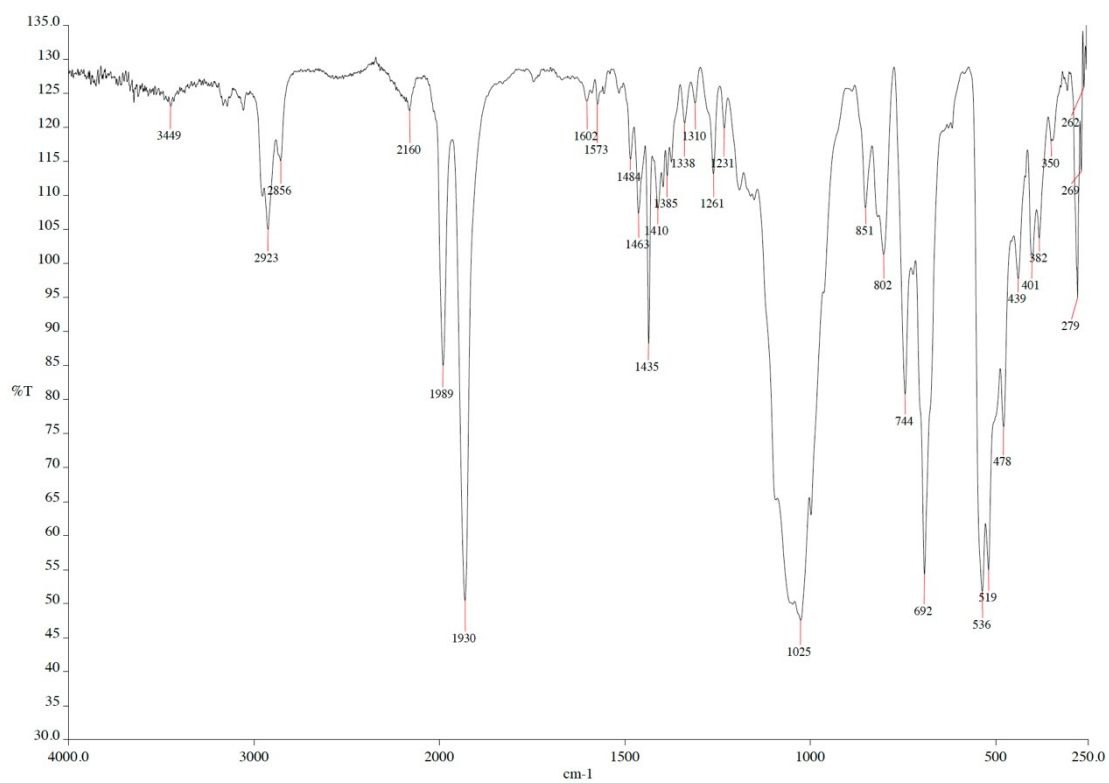

**Figure S15.** FT-IR spectra of **2**.

### 3. NMR Spectra of Table 1

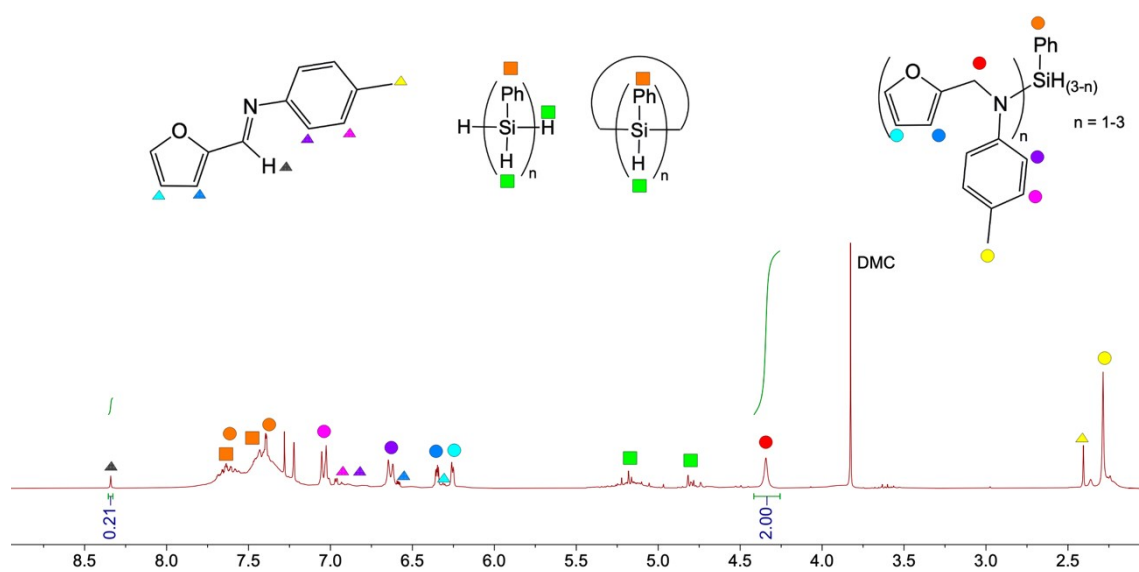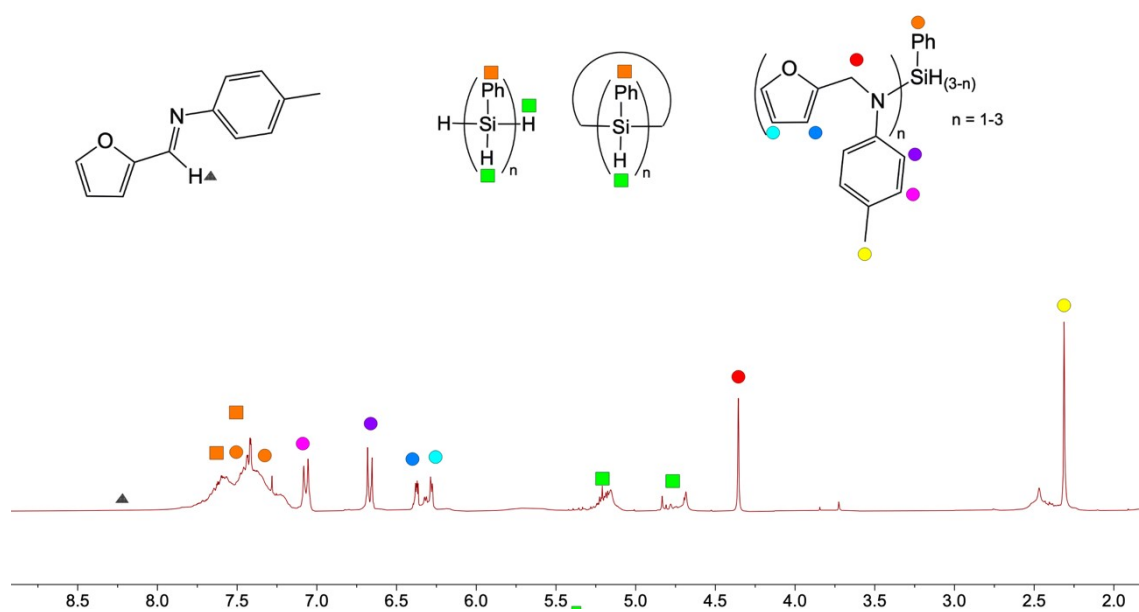

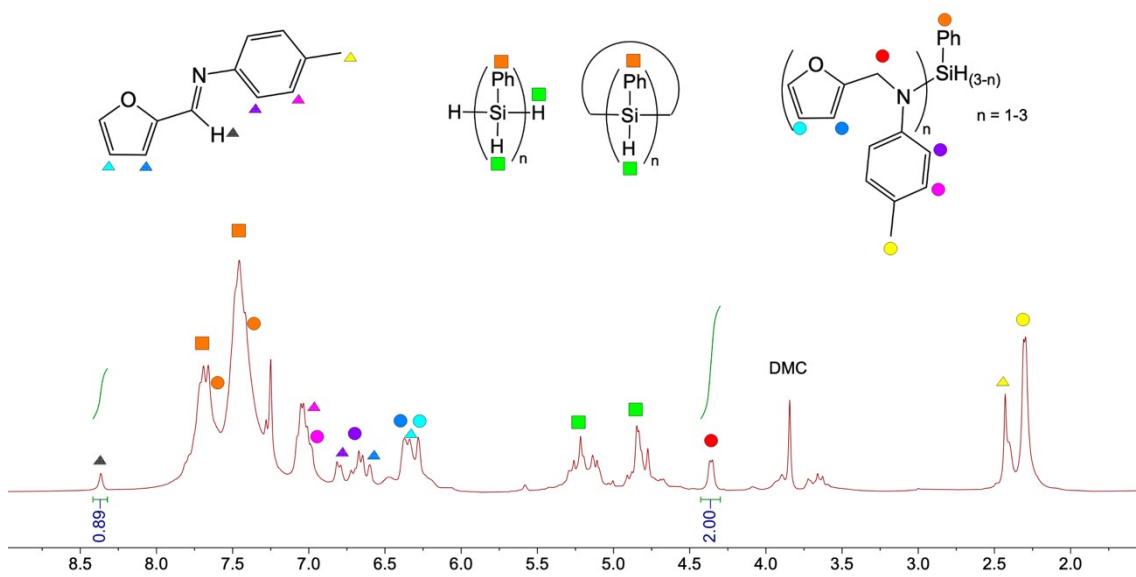

**Figure S18.**  $^1\text{H}$  NMR: Table 1, Entry 3.

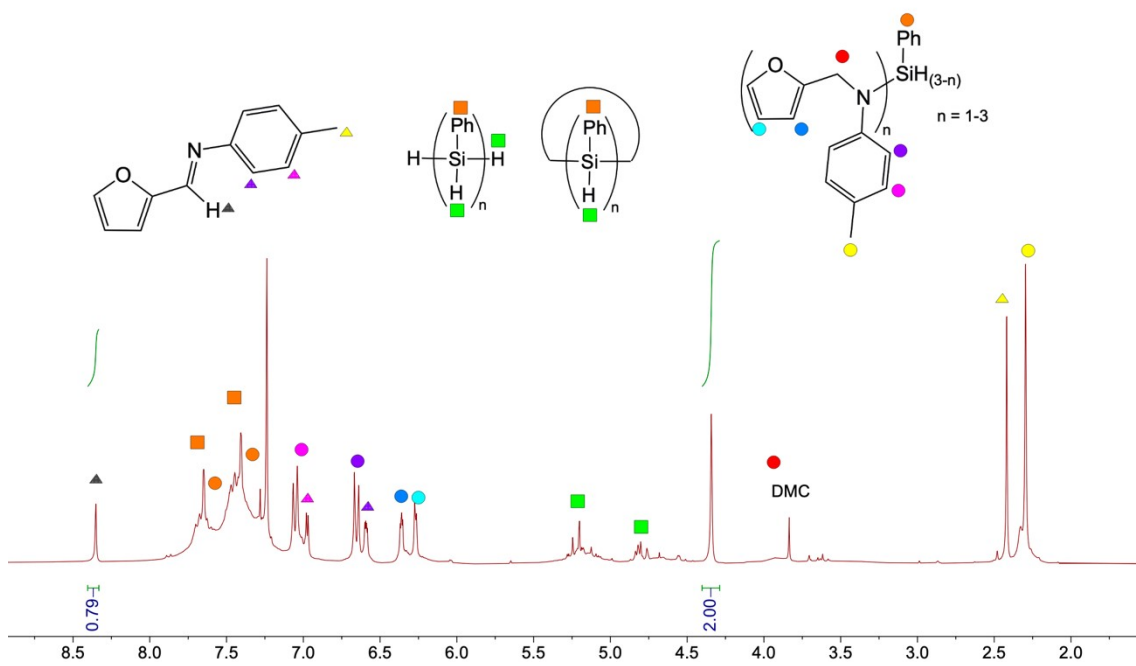

**Figure S19.**  $^1\text{H}$  NMR: Table 1, Entry 4.

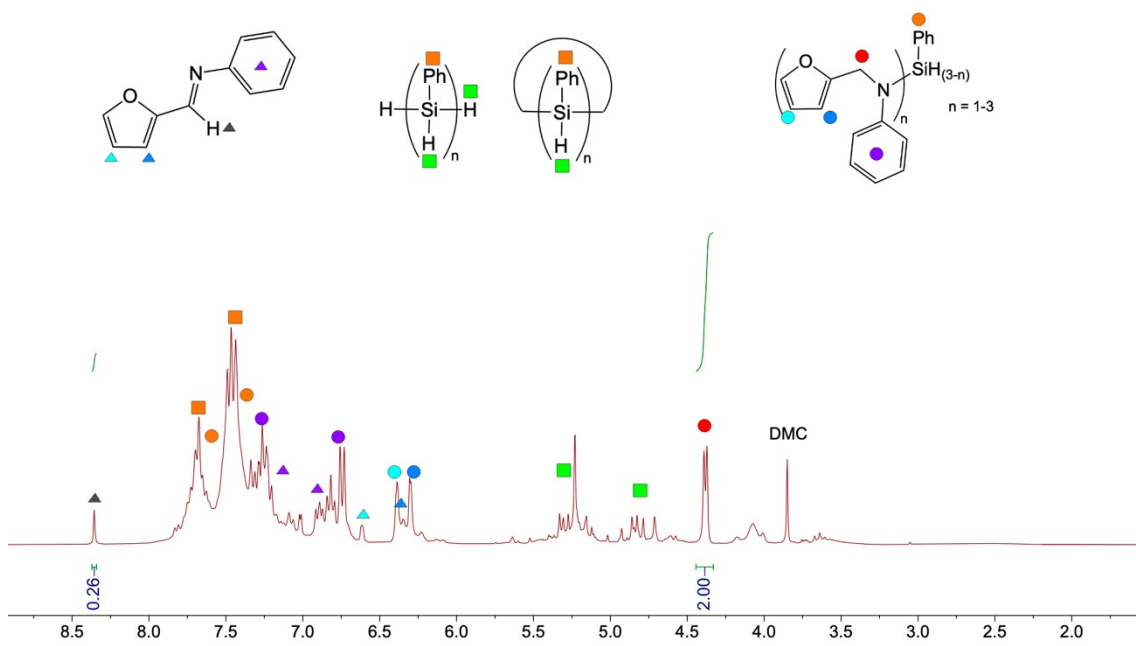

Figure S20.  $^1\text{H}$  NMR: Table 1, Entry 5.

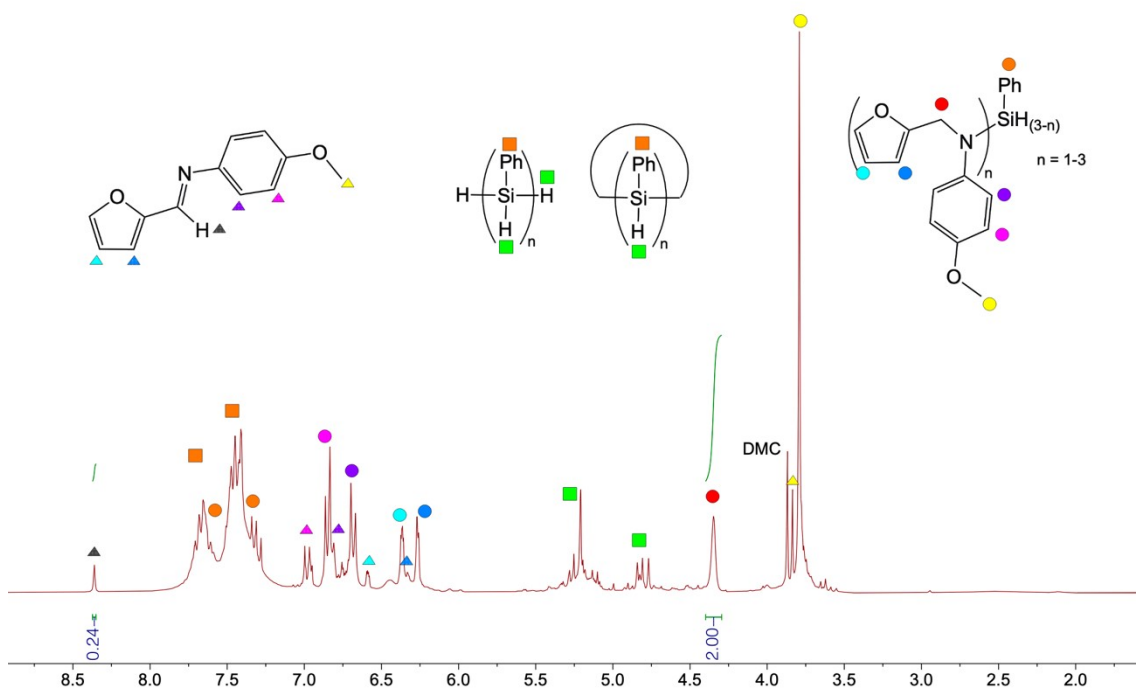

Figure S21.  $^1\text{H}$  NMR: Table 1, Entry 6.

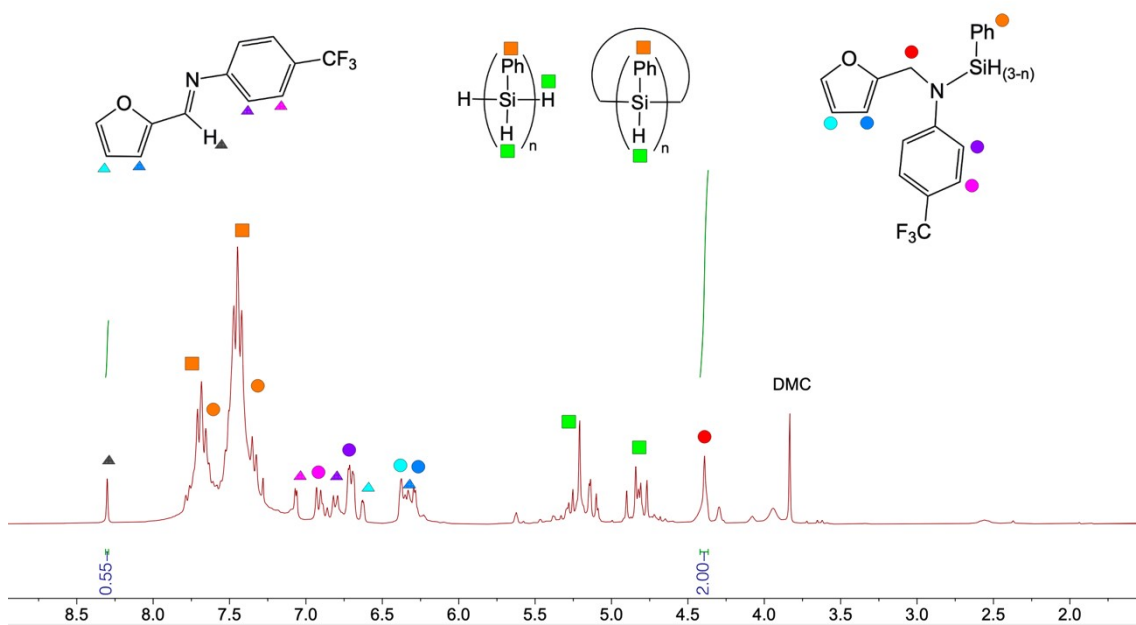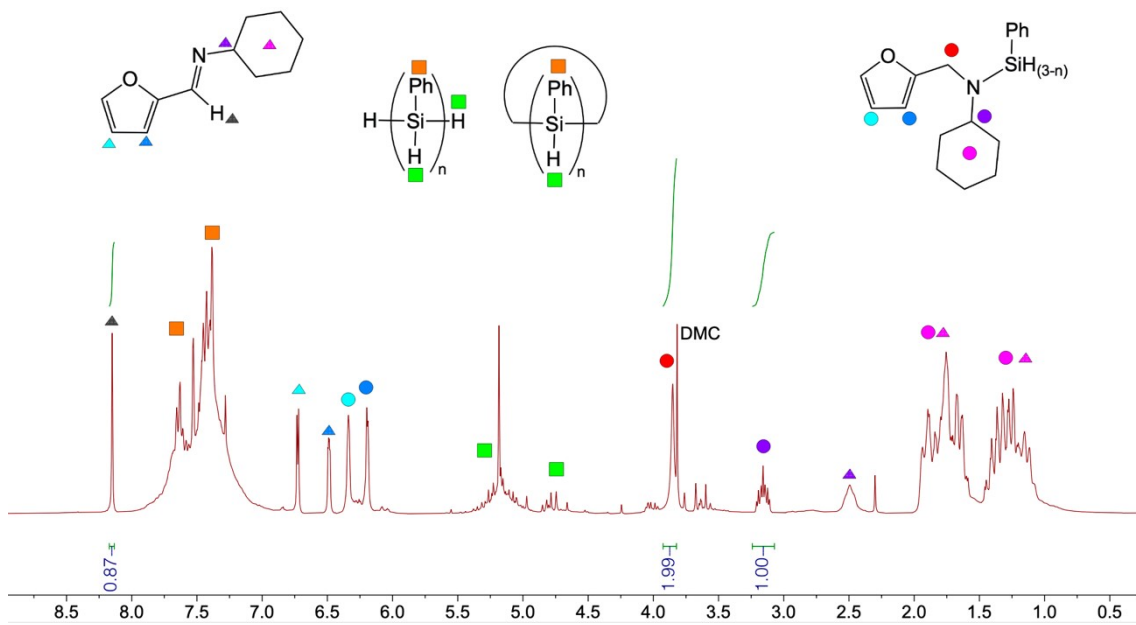

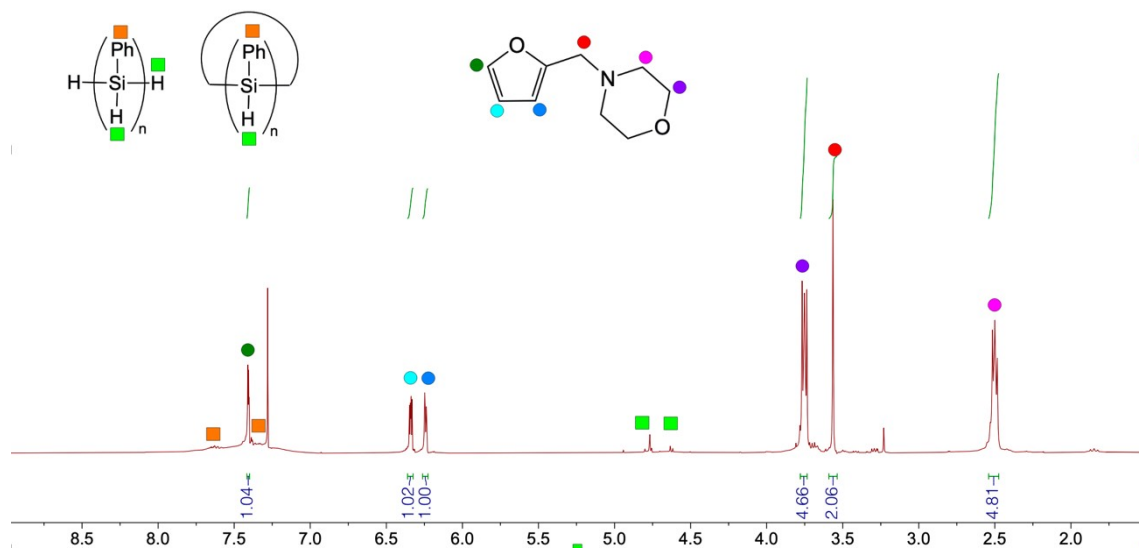

**Figure S24.** <sup>1</sup>H NMR: Table 1, Entry 9.

#### 4. NMR Spectra of Table 2

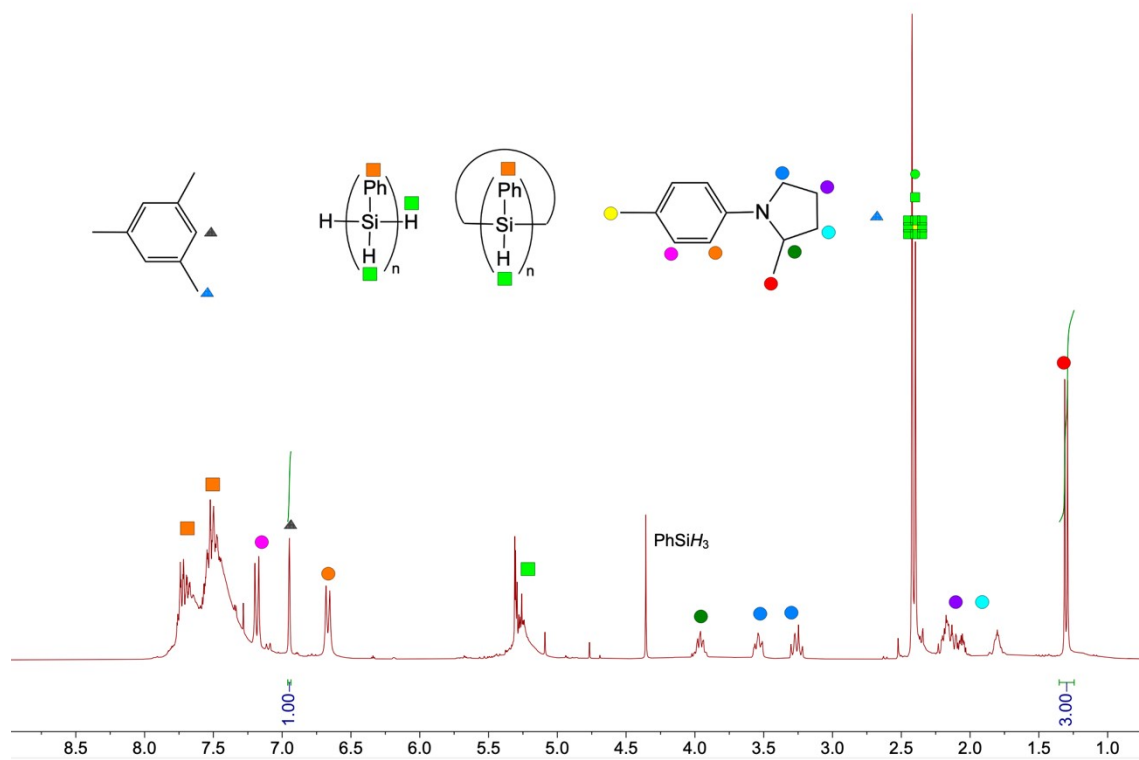

Figure S25.  $^1\text{H}$  NMR: Table 2, Entry 1.

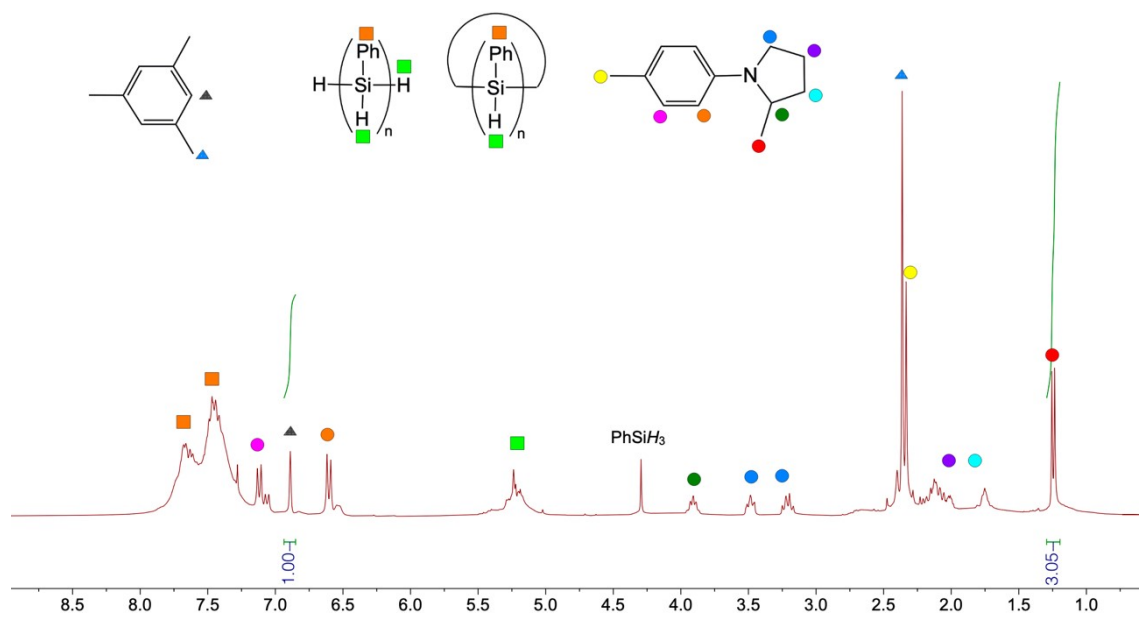

Figure S26.  $^1\text{H}$  NMR: Table 2, Entry 2.

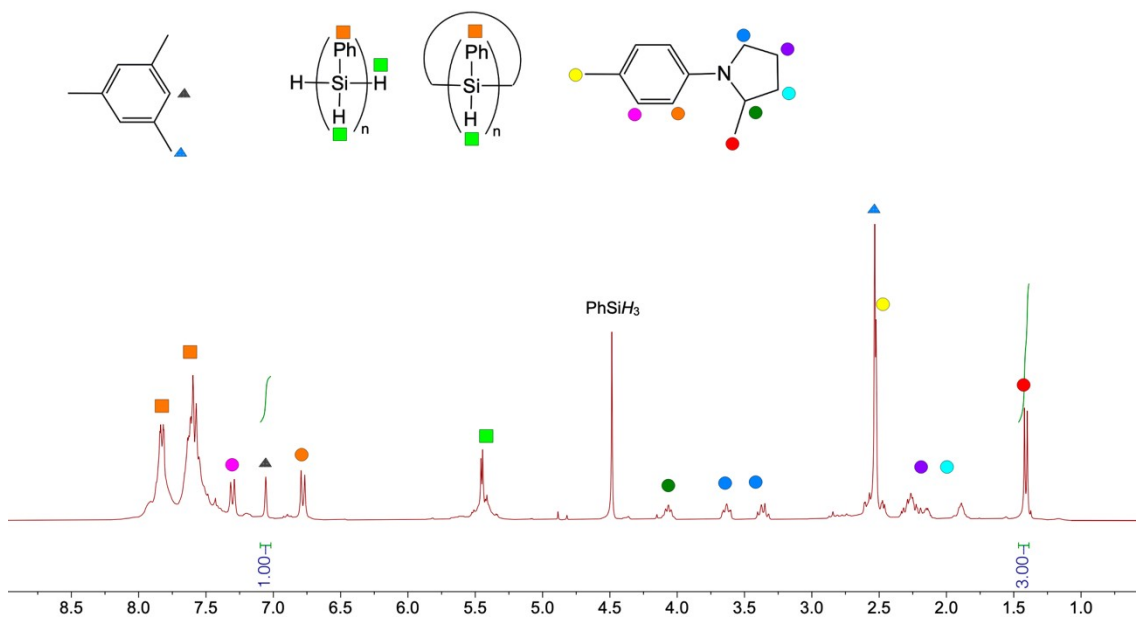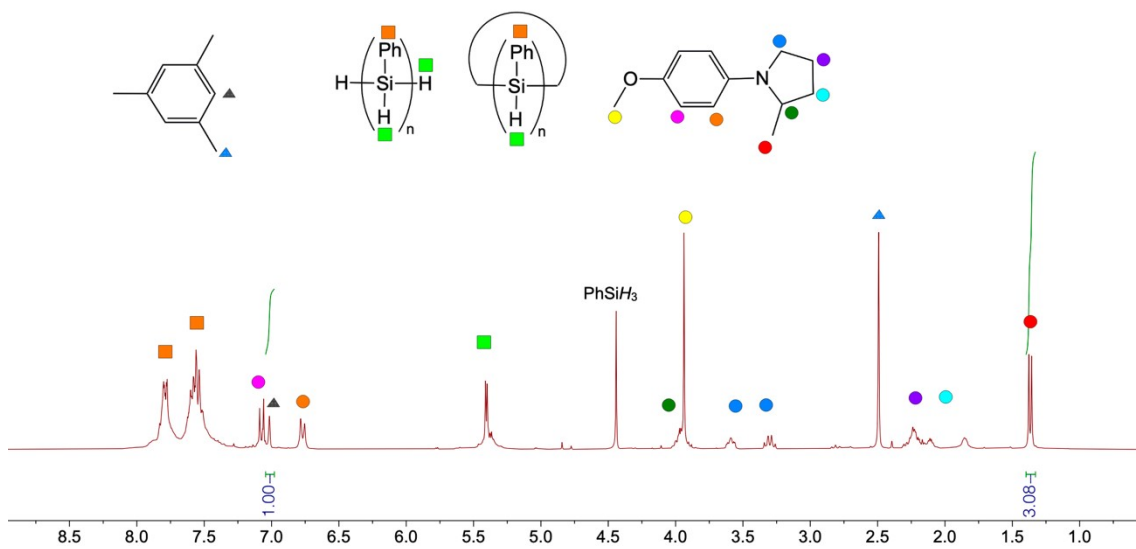



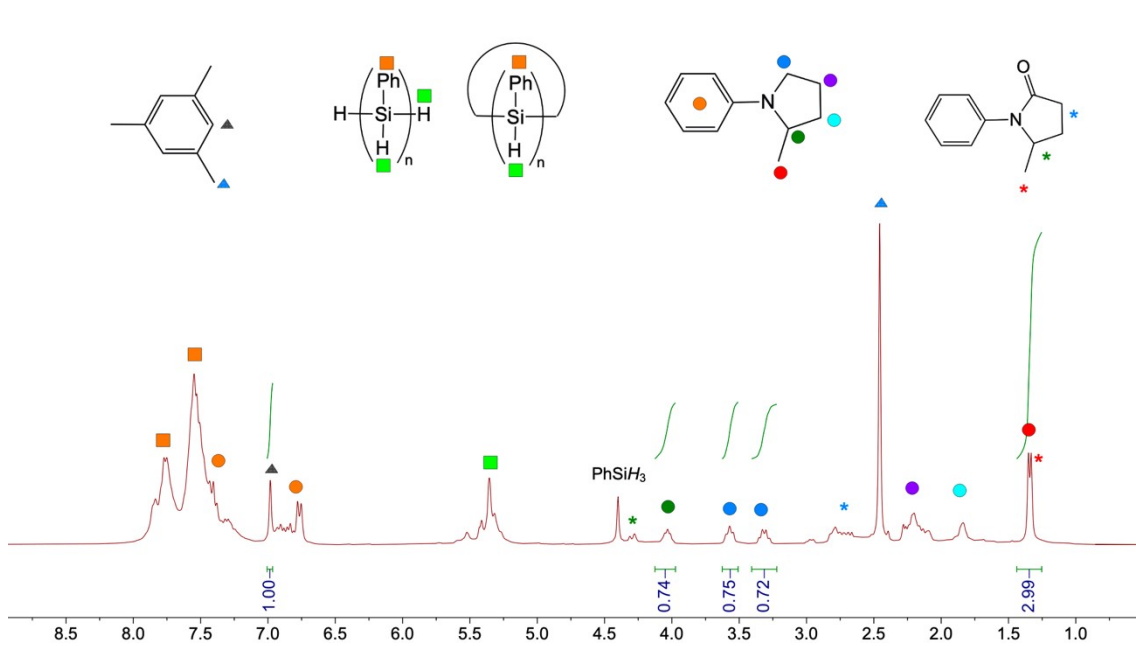

**Figure S29.**  $^1\text{H}$  NMR: Table 2, Entry 5.

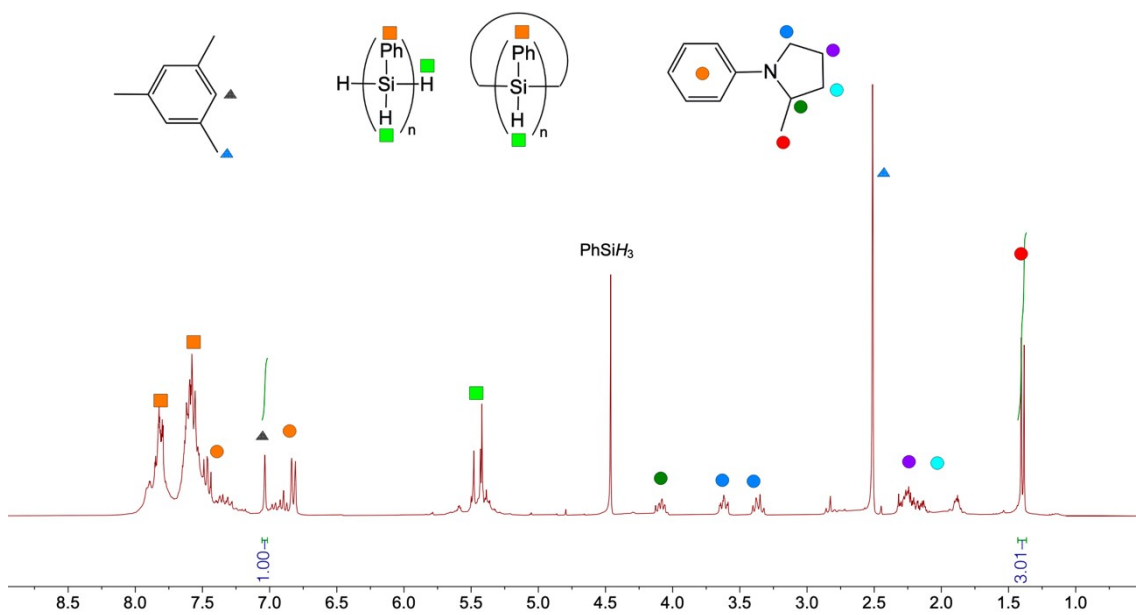

**Figure S30.**  $^1\text{H}$  NMR: Table 2, Entry 6.

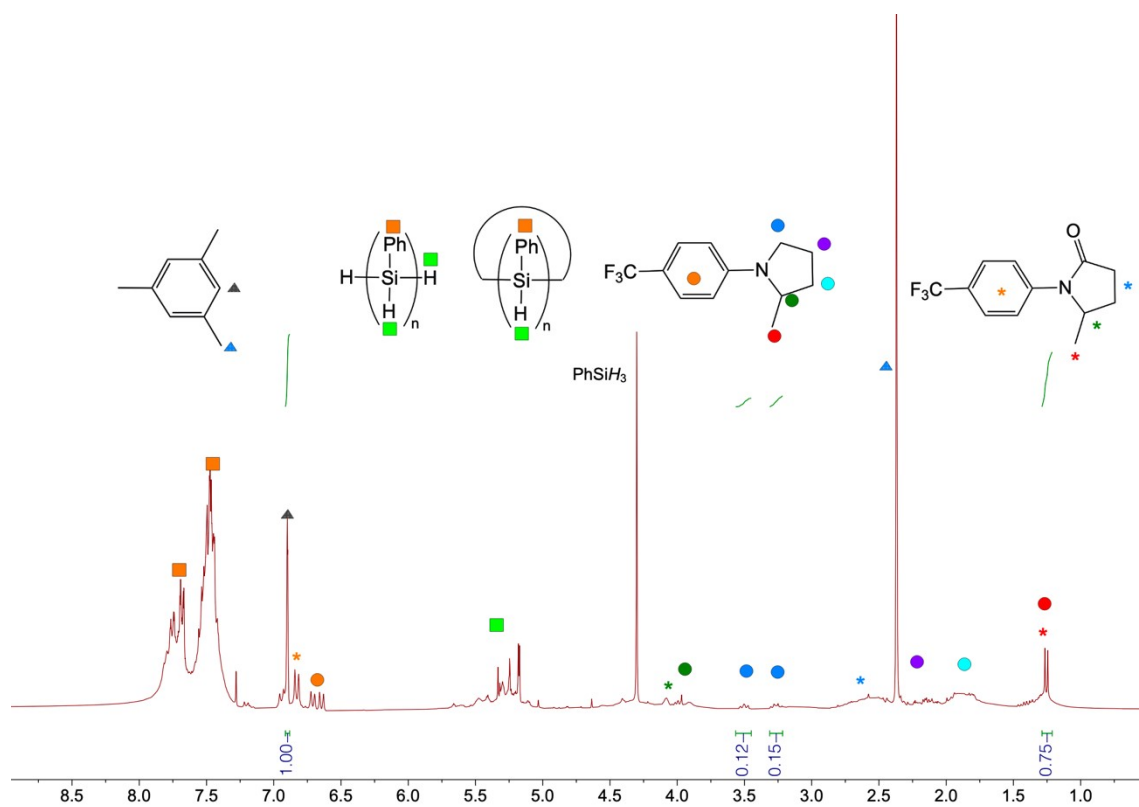

**Figure S31.**  $^1\text{H}$  NMR: Table 2, Entry 7.

## 5. NMR spectra of stoichiometric experiments

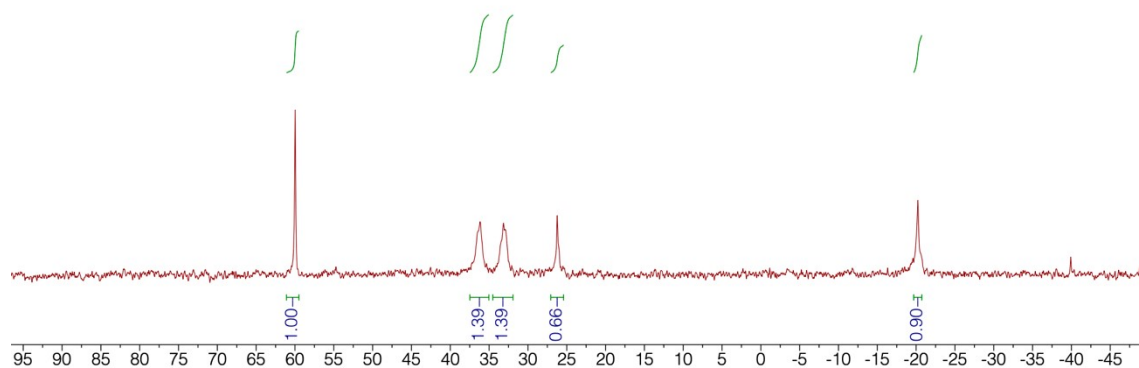

**Figure S32.**  $^{31}\text{P}$  NMR of **1** with 2 equivalents of  $\text{PhSiH}_3$  at 60 °C after 24 h in  $\text{THF-d}_8$ .

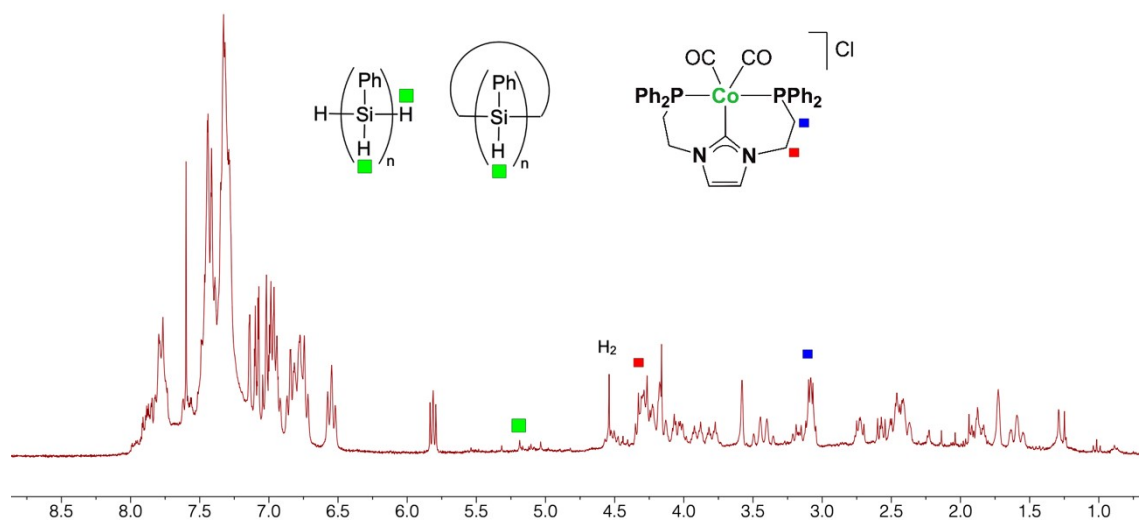

**Figure S33.**  $^1\text{H}$  NMR of **1** with 2 equivalents of  $\text{PhSiH}_3$  at 60 °C after 24 h in  $\text{THF-d}_8$ .

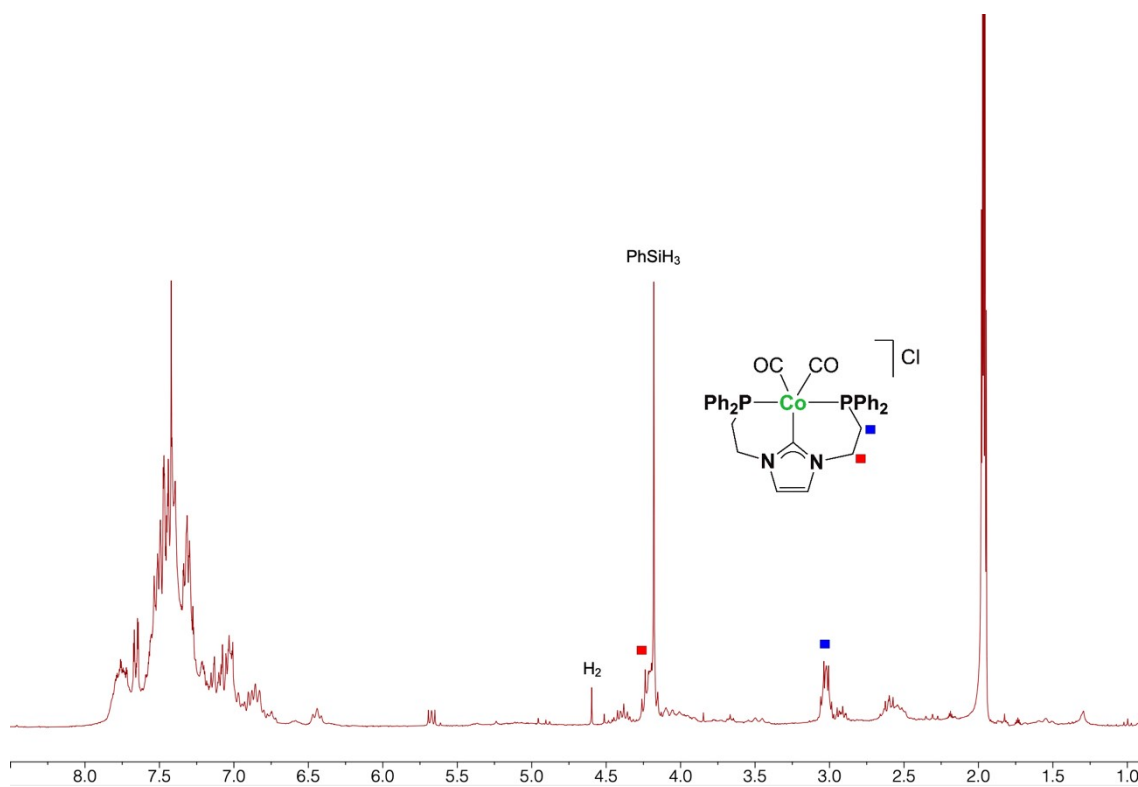

**Figure S34.**  $^1\text{H}$  NMR of **1** with 2 equivalents of  $\text{PhSiH}_3$  at  $80\text{ }^\circ\text{C}$  after 24 h in  $\text{CD}_3\text{CN}$ .

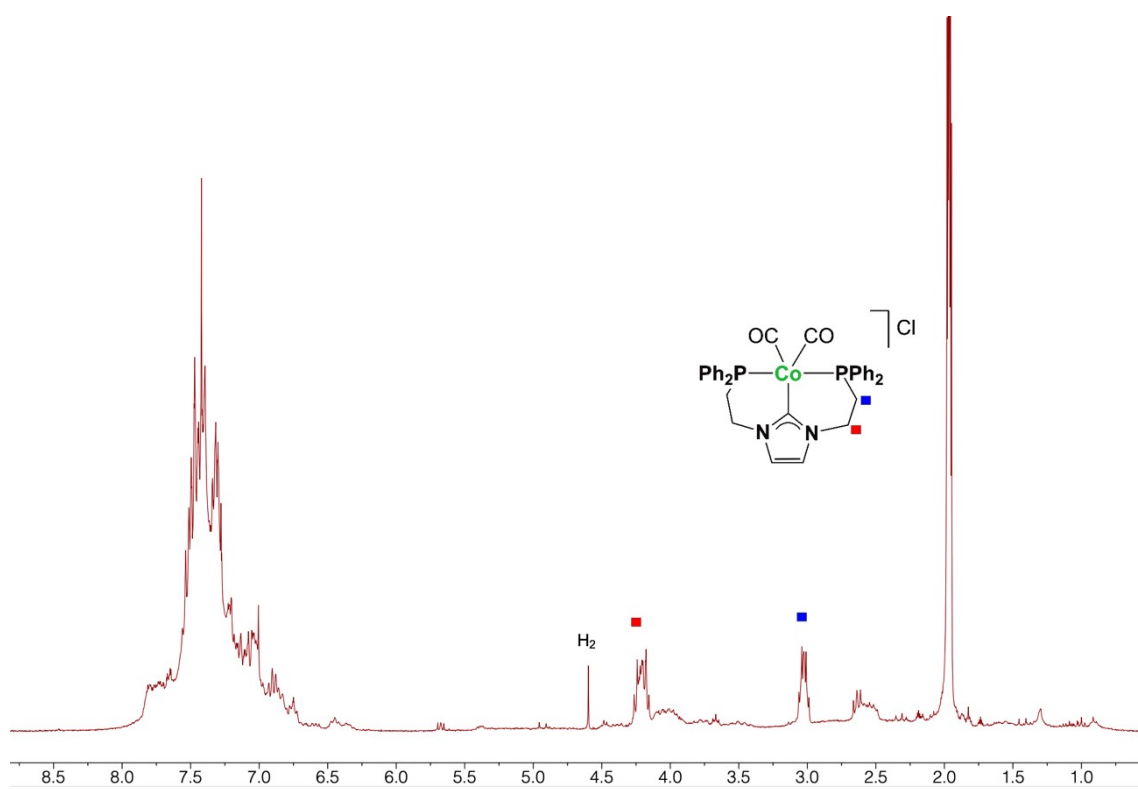

**Figure S35.**  $^1\text{H}$  NMR of **1** with 2 equivalents of  $\text{PhSiH}_3$  at  $80\text{ }^\circ\text{C}$  after 14 d in  $\text{CD}_3\text{CN}$ .

## 6. NMR spectra of the dehydrocoupling products

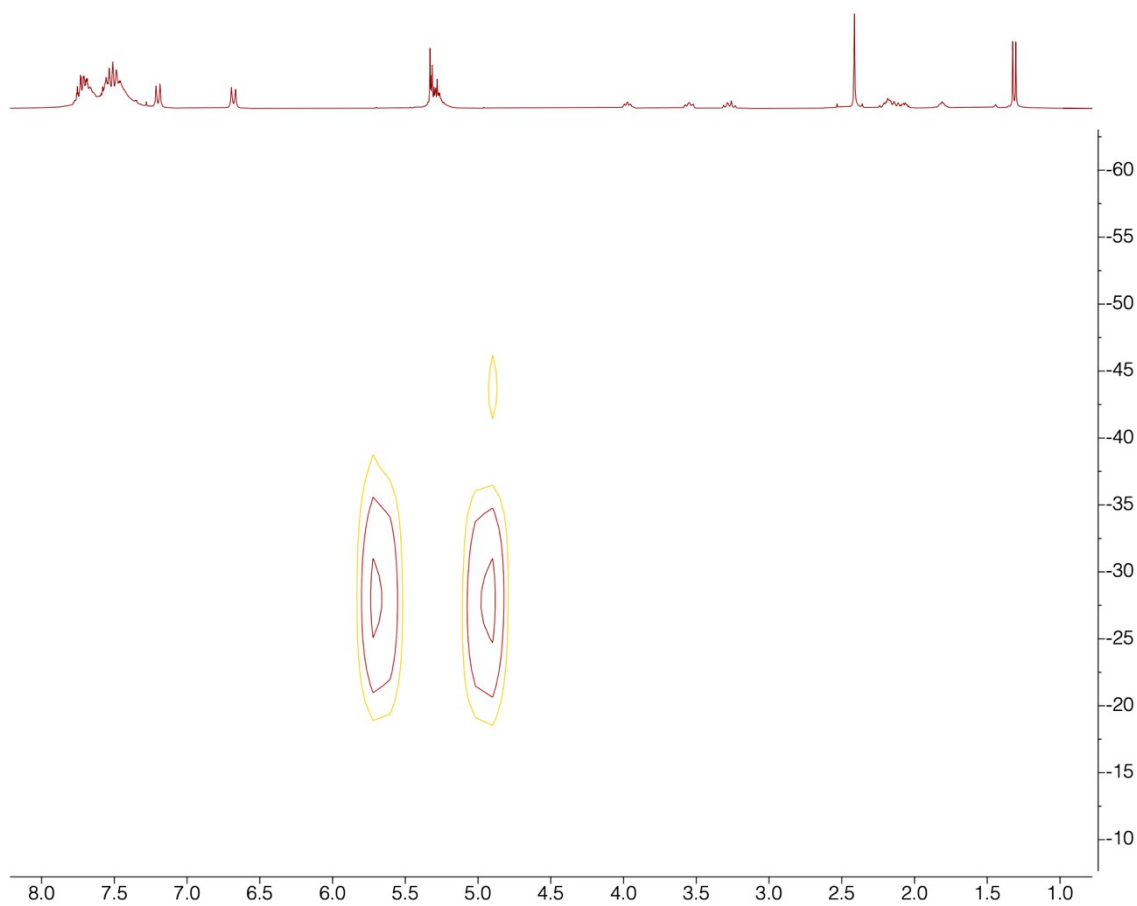

**Figure S36.**  $^{19}\text{Si}$ - $^1\text{H}$  HMBC spectrum of the reductive amination of levulinic acid with *p*-toluidine (Table 2, Entry 3).

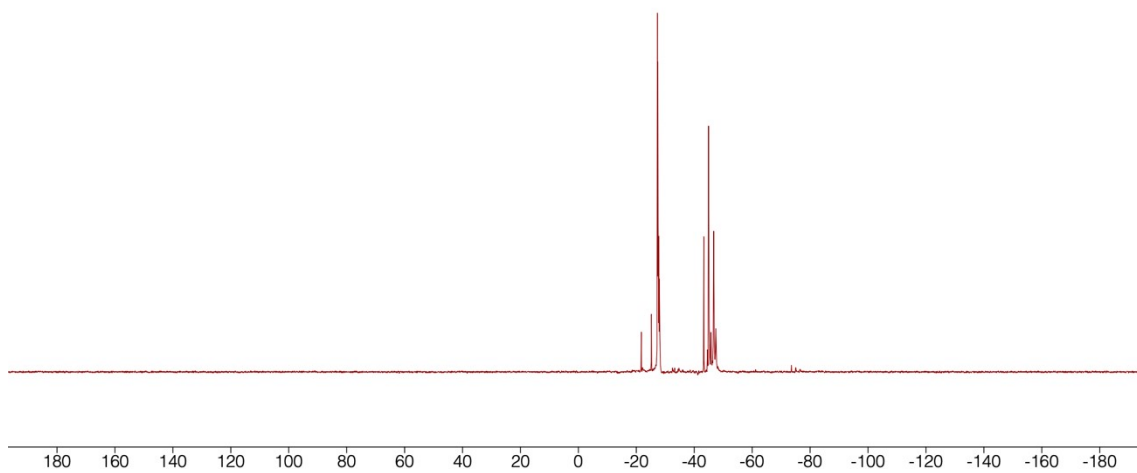

**Figure S37.**  $^{29}\text{Si}$  DEPT of the reductive amination of levulinic acid with *p*-toluidine (Table 2, Entry 3).
